# Supplementary material for: Temporo-cerebellar connectivity underlies timing constraints in audition
Source: eLife. 2021 Sep 20;10:e67303. doi: 10.7554/eLife.67303 (PMC8480974; doi:10.7554/eLife.67303)
Supplement: Figure 2—source data 1. [file elife-67303-fig2-data1.xlsx]

## Sheet: behavioral_raw_data
ID	Group	LesionVol	Handedness	Age	Gender	Naming	Diskrimination	dBL500	dBR500	dBL750	dBR750	dBL1000	dBR1000	dBL1500	dBR1500	dBL2000	dBR2000	Tokentest	NIHSS	PseudoPoA	PseudoPoA_ErrorRate	PseudoManner	PseudoManner_ErrorRate	PseudoMeta	PseudoSame	PseudoInitial	PseudoFinal	PseudoTotal	PseudoTotal_ErrorRate	RealPoA	RealPoA_ErrorRate	RealManner	RealManner_ErrorRate	RealMeta	RealSame	RealInitial	RealFinal	RealTotal	RealTotal_ErrorRate	PhonemPoA	PhonemPoA_ErrorRate	PhonemVoice	PhonemVoice_ErrorRate	PhonemPV	PhonemPV_ErrorRate	PhonemFricatives	PhonemFricatives_ErrorRate	PhonemSame	PhonemTotal
14	1	#NULL!	100	57	1	54	3	15	15	5	10	5	15	10	15	10	10	0	0	2	0.166667	0	0	0	0	0	2	2	0.0277778	0	0	0	0	0	0	0	0	0	0	1	0.1	1	0.0833333	0	0	0	0	0	2
15	1	#NULL!	100	60	1	74	3	20	20	20	20	20	20	25	30	25	30	0	0	0	0	0	0	0	0	0	0	0	0	0	0	0	0	0	0	0	0	0	0	1	0.1	0	0	0	0	0	0	0	1
16	1	#NULL!	80	46	2	2	2	10	10	5	10	0	5	5	5	5	5	0	0	0	0	0	0	0	0	0	0	0	0	0	0	0	0	0	1	0	0	0	0	0	0	1	0.0833333	0	0	0	0	0	1
17	1	#NULL!	100	52	2	34	2	5	10	5	10	10	10	10	10	10	10	0	0	0	0	0	0	0	0	0	0	0	0	0	0	0	0	0	1	0	0	0	0	0	0	0	0	0	0	0	0	0	1
18	1	#NULL!	80	69	1	114	6	15	20	10	15	15	15	10	15	15	10	0	0	1	0.0833333	0	0	0	2	0	1	3	0.0416667	1	0.0833333	0	0	0	1	1	0	2	0.0277778	5	0.5	3	0.25	2	0.25	2	0.4	1	13
19	1	#NULL!	70	62	1	5	2	5	5	10	10	20	20	30	30	25	20	0	0	0	0	0	0	0	0	0	0	0	0	0	0	0	0	0	0	0	0	0	0	0	0	0	0	0	0	0	0	0	0
20	1	#NULL!	80	58	2	314	6	15	15	15	10	10	10	15	15	10	15	0	0	1	0.0833333	1	0.0833333	0	1	0	1	2	0.0277778	0	0	0	0	0	1	0	0	1	0.0138889	0	0	0	0	0	0	0	0	0	0
21	1	#NULL!	85	51	2	74	6	15	10	10	10	10	10	5	5	5	5	0	0	0	0	0	0	0	0	0	0	0	0	0	0	0	0	0	1	0	0	1	0.0138889	0	0	0	0	0	0	0	0	0	0
22	1	#NULL!	100	42	1	204	6	10	10	10	10	5	5	10	5	5	5	0	0	0	0	0	0	0	0	0	0	0	0	0	0	0	0	0	1	0	0	1	0.0138889	1	0.1	1	0.0833333	0	0	0	0	0	2
23	1	#NULL!	100	39	2	64	8	5	10	5	10	10	5	5	5	5	10	0	0	0	0	0	0	0	0	0	0	0	0	0	0	0	0	0	0	0	0	0	0	0	0	0	0	0	0	0	0	0	0
24	1	#NULL!	100	61	1	15	3	15	15	15	20	15	20	15	20	10	15	0	0	0	0	0	0	0	6	0	0	6	0.0833333	0	0	0	0	0	1	0	0	1	0.0138889	1	0.1	2	0.166667	0	0	0	0	0	3
25	1	#NULL!	90	49	1	254	4	10	15	10	15	15	10	15	10	10	5	0	0	0	0	0	0	0	4	0	0	4	0.0555556	1	0.0833333	1	0.0833333	0	2	1	0	3	0.0416667	0	0	1	0.0833333	1	0.125	0	0	1	4
1	2	144.6	100	56	1	124	6	10	15	10	10	5	5	10	10	15	15	37	4	1	0.0833333	0	0	0	0	0	1	1	0.0138889	0	0	0	0	0	0	0	0	0	0	0	0	0	0	0	0	0	0	0	0
2	2	28.1	100	59	1	124	10	5	10	5	5	5	5	10	10	10	5	0	1	1	0.0833333	0	0	0	4	0	1	5	0.0694444	0	0	0	0	0	0	0	0	0	0	3	0.3	0	0	0	0	0	0	1	4
3	2	27.4	60	45	2	64	2	5	15	10	10	10	10	10	10	5	5	2	1	0	0	0	0	0	0	0	0	0	0	0	0	0	0	0	1	0	0	1	0.0138889	0	0	0	0	0	0	0	0	1	1
5	2	50.9	100	52	2	714	134	5	10	5	10	10	10	5	10	5	5	0	3	2	0.166667	0	0	0	1	0	2	3	0.0416667	0	0	0	0	0	2	0	0	2	0.0277778	3	0.3	2	0.166667	0	0	0	0	0	5
6	2	23.5	100	67	1	164	11	20	15	20	15	10	10	15	15	25	15	3	1	7	0.583333	2	0.166667	0	2	6	3	11	0.152778	1	0.0833333	1	0.0833333	0	1	1	1	3	0.0416667	7	0.7	3	0.25	4	0.5	2	0.4	1	17
7	2	80.1	90	61	1	114	18	15	15	10	15	10	15	10	10	15	15	16	3	2	0.166667	0	0	0	2	1	1	4	0.0555556	1	0.0833333	0	0	0	0	1	0	1	0.0138889	3	0.3	1	0.0833333	0	0	0	0	0	4
8	2	60.2	60	57	2	114	7	10	20	10	20	10	20	20	20	20	30	0	1	0	0	0	0	0	1	0	0	1	0.0138889	0	0	0	0	0	0	0	0	0	0	0	0	0	0	0	0	0	0	0	0
9	2	24.4	100	49	2	154	6	10	10	10	10	10	10	10	10	10	5	0	0	0	0	0	0	0	0	0	0	0	0	0	0	0	0	0	0	0	0	0	0	0	0	0	0	0	0	0	0	0	0
10	2	5.4	100	41	1	354	6	10	10	10	10	5	15	15	15	20	15	0	2	3	0.25	0	0	0	0	1	2	3	0.0416667	0	0	0	0	0	2	0	0	2	0.0277778	5	0.5	3	0.25	0	0	0	0	0	8
11	2	56.8	100	39	2	704	22	10	10	10	10	5	5	10	10	5	10	0	2	0	0	0	0	0	1	0	0	1	0.0138889	0	0	0	0	0	0	0	0	0	0	1	0.1	1	0.0833333	0	0	0	0	0	2
12	2	41.5	90	61	1	694	11	5	10	5	10	5	15	15	20	25	25	2	1	7	0.583333	1	0.0833333	0	2	1	6	10	0.138889	3	0.25	0	0	0	0	1	2	3	0.0416667	4	0.4	0	0	1	0.125	0	0	0	5
13	2	39.5	80	50	1	64	5	5	5	5	5	10	10	5	10	5	5	0	2	0	0	0	0	0	0	0	0	0	0	0	0	0	0	0	1	0	0	1	0.0138889	1	0.1	0	0	0	0	0	0	2	3
[truncated: 6 more columns]
